# Supplementary material for: A Novel High Content Angiogenesis Assay Reveals That Lacidipine, L-Type Calcium Channel Blocker, Induces In Vitro Vascular Lumen Expansion
Source: Int J Mol Sci. 2022 Apr 28;23(9):4891. doi: 10.3390/ijms23094891 (PMC9100973; doi:10.3390/ijms23094891)
Supplement: Supplementary file 1 [file ijms-23-04891-s001.zip]

Archive with 5 entries (5 files):
- Figure S1.pdf
- Figure S2.pdf
- Movie S1.mov
- Movie S2.mov
- Movie S3.mov
